# Supplementary material
Source: MDPI journal article supplement (https://www.mdpi.com/2072-4292/14/12/2882)
Supplement: s1 [file s1]

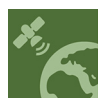

## Supplementary Materials:

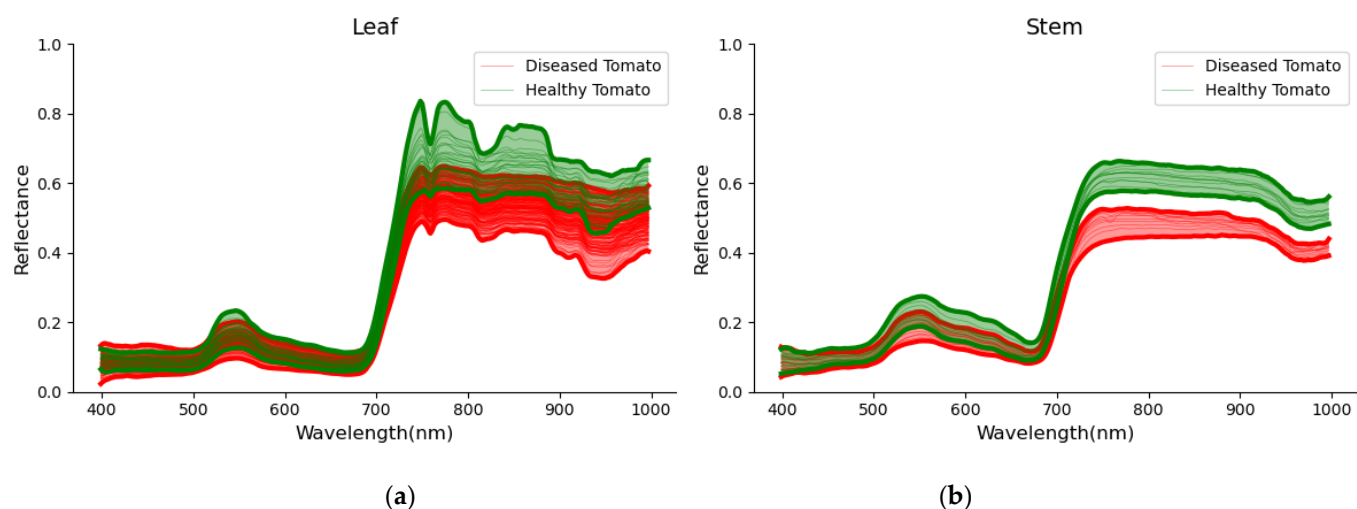

**Figure S1.** Comparison between spectra of healthy and diseased tomato in Hunan Province, China, 2022: (a) spectra of healthy and diseased tomato leaf; (b) spectra of healthy and diseased tomato stem.

**Table S1.** Results of SFS, SA and GA to select the optimal subset of features.

| Feature selection methods | Output    |                    |                     |
|---------------------------|-----------|--------------------|---------------------|
|                           | Leaf/Stem | Vegetation Indices | Principal Component |
| SFS                       | Leaf      | PRI550             | PC4~PC12            |
|                           |           | Vog1               | PC14                |
|                           |           | Vog2               | PC19                |
|                           |           | Ctr2               |                     |
|                           |           | SRPI               |                     |
|                           | Stem      | PRI550             | PC3                 |
|                           |           | WI                 | PC6~PC10            |
|                           |           | WI:NDVI            | PC12~PC14           |
|                           |           | PRI570             | PC17~PC18           |
|                           |           | BWI2               |                     |
|                           |           | G                  |                     |
|                           |           | PRI1               |                     |
|                           |           | LIC1               |                     |
|                           |           | GM1                |                     |
| SA                        | Leaf      | PRI550             | PC1~PC3             |
|                           |           | OSAVI              | PC5~PC9             |
|                           |           | NPCI               | PC12                |
|                           |           | SIPI               |                     |
|                           |           | PRI570             |                     |
|                           |           | ZM                 |                     |
|                           |           | SRPI               |                     |
|                           |           | NPQI               |                     |
|                           |           | PRI1               |                     |
|                           |           |                    |                     |

|    |      |         |           |
|----|------|---------|-----------|
| GA | Stem | Ctr2    |           |
|    |      | Vog2    |           |
|    |      | Vog3    |           |
|    |      | GM2     |           |
|    |      | PRI550  | PC2       |
|    |      | RDVI    | PC6       |
|    |      | WI      | PC9       |
|    |      | LIC1    | PC13      |
|    |      | Vog2    | PC18      |
|    |      | Vog3    |           |
|    |      | GM2     |           |
|    | Leaf | SRPI    | PC4       |
|    |      | Vog1    | PC6~PC9   |
|    |      | Ctr2    | PC11~PC12 |
|    | Stem | NWI     | PC9       |
|    |      | WI:NDVI | PC10      |
|    |      | PRI2    | PC13      |
|    |      | NPCI    | PC18      |
|    |      | Ctr1    |           |
|    |      | GM1     |           |

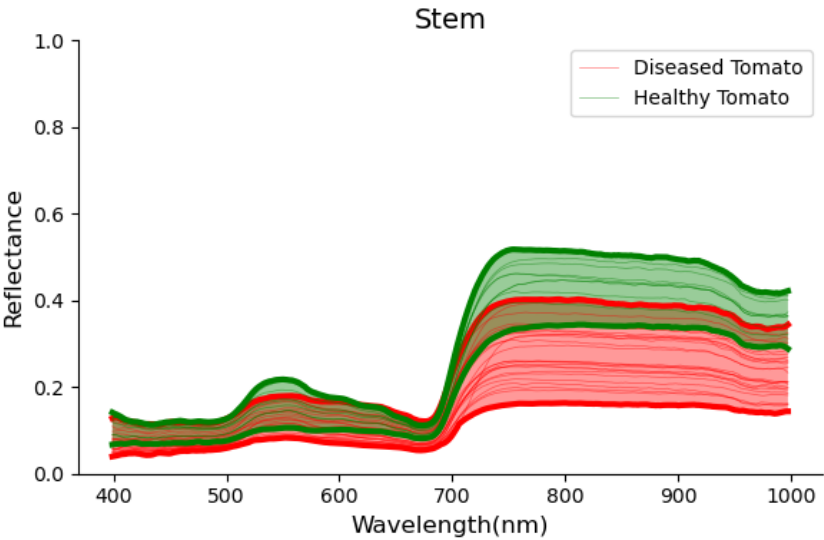

**Figure S2.** Comparison between spectra of healthy and diseased tomato stems of experimental to-mato field, 2022.
